# Supplementary material for: Efficient production of citric acid from lignocellulose hydrolysate by metabolically engineered Yarrowia lipolytica
Source: Royal Society of Chemistry journal article supplement (doi:10.1039/d4gc05521g), 2024-12-10
Supplement: d4gc05521g1.pdf [file d4gc05521g1.pdf]

Table S1 The primers used in this study.

| Primers    | Sequence (5'-3')                                            | Function                                          |
|------------|-------------------------------------------------------------|---------------------------------------------------|
| XDH F      | cggttgagcatccgttgattccgaaccatatgagagaccgggtggcggcgattttgt   | ssXDH expression cassette for pUC-X               |
| XDH R      | aaatacgccgcaaccggctctctgtttaacaaacccaaaaggccgaaggctgg       | ssXR expression cassette for pUC-X                |
| XR F       | cagccttcggccctttgggtttatttaaatagagaccgggtggcggcgatttt       | ylXX expression cassette for pUC-X                |
| XR R       | gcaggacatcctactcgtcgcggccgcgcaaattaaagccttcgagcgtcc         | ylXX expression cassette for pUC-X                |
| XK F       | ggacgctcgaaggcttaatttgcgcccgcgtttaacagagaccgggtggcggcg      | expression cassette for pUC-X                     |
| XK R       | cgtagggacagccatggaggtacccccagctttttctccaggcaggcgttttcg      | expression cassette for pUC-X                     |
| TEF F      | tagcatacattatacgaagttatacgcgtagagaccgggtggcggcgattttgt      | ICL expression cassette for pUC-I                 |
| ICL-TEF R  | cttggttaggtagcagcaccatctcgggttagtactgcaaaaagtgtg            | ICL expression cassette for pUC-I                 |
| ICL F      | cagcactttttgcagtactaacccagatgccgaacagcagcgattcaaca          | AMPD expression cassette for pUC-A                |
| ICL R      | ggcaacgtggggacagccatggaggtaccttaaagcttgacttgaactgttc        | AMPD expression cassette for pUC-A                |
| AMPD-TEF R | tgatatcattgcttctcggcatctcgggttagtactgcaaaaagtgtg            | YHMP expression cassette for pUC-Y                |
| AMPD F     | cagcactttttgcagtactaacccagatgccgcagcaagcaatggatatca         | YHMP expression cassette for pUC-Y                |
| AMPD R     | ggcaacgtggggacagccatggaggtaccttaaagcttgacttgaactgttc        | YHMP expression cassette for pUC-Y                |
| YHMP-TEF R | cttggttaggtagcagcaccatctcgggttagtactgcaaaaagtgtg            | Cit1 expression cassette for pUC-C1               |
| YHMP F     | tgagcgacctgttgtaagcactagcactggccggtcgataatttaactg           | Cit2 expression cassette for pUC-C2               |
| YHMP R     | ccgtttaccgcgcgcttggttgaatttgaattcaaacccaaaaggccgaaggctggg   | <i>DGA1</i> gene knockout cassette for pUC-ΔDGA1- |
| Cit1-TEF R | cacgggcggttcgaaggggatcatctcgggttagtactgcaaaaagtgtg          | <i>DGA1</i> gene knockout cassette for pUC-ΔDGA1- |
| Cit1 F     | cagcactttttgcagtactaacccagatgatccctctcgaaccgcccgtg          | HUH                                               |
| CIT R      | gcaacgtggggacagccatggaggtaccttatttggcgaccttaata             | HUH                                               |
| Cit2-TEF R | acggcgggacgaatagcagaatcatttgaatgattcttatactcagaaggaaatg     | HUH                                               |
| Cit2 F     | tgagtataagaatcattcaaaatgattctgctattctcccgcggttcgatctt       | <i>DGA2</i> gene knockout cassette for pUC-ΔDGA2- |
| Cit2 R     | agcgtgacataactaattacatgacctaggttagagcttgaggccaacgagctca     | <i>DGA2</i> gene knockout cassette for pUC-ΔDGA2- |
| 1-AMP F    | tgtagcttaaacagagagtgatgtgtatcgaatttaaatagcttggcgtaatcat     | HUH                                               |
| 1-AMP R    | acgcctccatctatagattccccctgtggccctgtatttaataattcactggccgctg  | HUH                                               |
| DGA1UP F   | acgttgtaaaacgacggccagtgaaattttaataacagggccacagggggaatctata  | HUH                                               |
| DGA1UP R   | atgcaccactggaagatccgggaattcgtttaacagcttttgtttgtgtgacttgc    | HUH                                               |
| DGA1DN F   | gaacagcttaattaaggtaccaagcttgcggccgcggaaaactgcctgggttaggcaaa | HUH                                               |
| DGA1DN R   | cagctatgacctgattacgccaagctatttaaatcgatacacatctcactctcgttg   | HUH                                               |
| 2-AMP F    | actccgtttccaatcagcaccgaggccaactcgtaatttaaatagcttggcgtaatcat | HUH                                               |
| 2-AMP R    | tcgtagagcagttcagctcgtactcgcacgatccatttaataattcactggccgctg   | HUH                                               |
| DGA2UP F   | gacgttgtaaaacgacggccagtgaaattttaaatggatcgtcaggtacgagctgaa   | HUH                                               |
| DGA2UP R   | atgcaccactggaagatccgggaattcgtttaactttgcggcggttacgggtacagcg  | HUH                                               |
| DGA2DN F   | gaacagcttaattaaggtaccaagcttgcggccgcataacactcatcagtagccttta  | HUH                                               |
| DGA2DN R   | cagctatgacctgattacgccaagctatttaaatcaggttggcctcgggtgctgatt   | HUH                                               |

|          |                                                             |                   |
|----------|-------------------------------------------------------------|-------------------|
| R        |                                                             |                   |
| A-AMP F  | agctccaggctctcgaatagactccatttaaatagcttggcgtaatcatggtcatagct |                   |
| A-AMP R  | agactctctggtgcataccatctgcaatttaaatattcactggccgctcgttttac    | <i>ACL</i> gene   |
| ACLUP F  | cgttgtaaacgacggccagtgaaatttttaattgcagatggtatgcaccagagagtc   | knockout          |
| ACLUP R  | caccactggaagatccgggaattcgtttaaacgtctgatgaggtgagttaaggggga   | cassette          |
| ACLDN F  | gaacagcttaattaaggtaccaagcttgcggccgatctaggtgatagaatatatag    | for pUC-          |
| ACLDN R  | ctatgacctgattacgccaagctatttaaatggagtctatcgagagcctggagct     | $\Delta$ ACL-     |
| S-AMP F  | actcctgttccaatcagcaccgaggccaactgtaatttaaatagcttggcgtaatcat  | HUH               |
| S-AMP R  | tcgtagagcagtttcagctcgtactcgacgatccATTTAAATAattcactggccgct   |                   |
| SCFUP F  | ttgtaaacgacggccagtgaaatttttaaatgacactggtgtccatgcagcatga     | <i>y/SCF</i> gene |
| SCFUP R  | cactggaagatccgggaattcgtttaaaccttggagagtgtatgagttgtgag       | knockout          |
| SCFDN F  | gcttaattaaggtaccaagcttgcggccgctcgatcccatccgattttggc         | cassette          |
| SCFDN R  | ctatgacctgattacgccaagctatttaaatagatcgtagcctcgtcctccc        | for pUC-          |
| A2-TEF F | cttaattaaggtaccaagcttgcagagaccgggttggcggcgt                 | <i>y/SCF</i> -    |
| Yht1-TEF | gttgatgatgtagcagtgccatctgcggtagtagtactgcaaaa                | HUH               |
| R        |                                                             |                   |
| Yht1 F   | gcagtactaaccgagatgggactcgtaacatcatcaaccgtg                  | Yht1              |
| Yht1 R   | ggcaacgtggggacaggccatggactagacagactcaatgtaga                | expression        |
| Yht-XPR  | ttgagtctgtctagtcctatggcctgtccccacgttcccgtctt                | cassette for      |
| F        |                                                             | pUC-Y1            |
| A2-XPR   | ttacgcagccgatcttaattaaggacacgggcatctcacttgcg                |                   |
| R        |                                                             |                   |
| Yht2-TEF | aaatacagccacaafaatggccatctgcggtagtagtactgcaaaa              |                   |
| R        |                                                             |                   |
| Yht2 F   | ttgcagtactaaccgagatggccattatgtggctgtatttggcttttggga         | Yht2              |
| Yht2 R   | gcaagaccggcaacgtggggacaggccatggactaatccgaatcaaatccagaat     | expression        |
| Yh2-XPR  | ttgattcggattagtcctatggcctgtccccacgttcccgtctt                | cassette for      |
| F        |                                                             | pUC-Y2            |
| Yht3-TEF | gtcggcatagcactagtgacatctgcggtagtagtactgcaaaa                |                   |
| R        |                                                             |                   |
| Yht3 F   | gcagtactaaccgagatgtccactagtgctatgaccgacgatt                 | Yht3              |
| Yht3 R   | caacgtggggacaggccatggactaagaggactcggagaagt                  | expression        |
| Yh3-XPR  | ccgagtctcttagtcctatggcctgtccccacgttcccgtctt                 | cassette for      |
| F        |                                                             | pUC-Y3            |
| Yht4-TEF | ttgagaaagacaaagcctcgcctatctgcggtagtagtactgcaaaa             |                   |
| R        |                                                             |                   |
| Yht4 F   | gcagtactaaccgagatggcgaggcttcttcttcaaacgg                    | Yht4              |
| Yht4 R   | ggggacaggccatggattaaacagtctcgggtactgaggatg                  | expression        |
| Yh4-XPR  | tcagtacaccgagactgttaatccatggcctgtccccacgttgc                | cassette for      |
| F        |                                                             | pUC-Y4            |
| Yht5-TEF | ggtaggggttatggacctgtacatctgcggtagtagtactgcaaaaa             |                   |
| R        |                                                             |                   |
| Yht5 F   | gcagtactaaccgagatgtacaaggctcacaaccctacctca                  | Yht5              |
| Yht5 R   | tggggacaggccatggattagacatgctcagtccaggatactg                 | expression        |
| Yh5-XPR  | tcttgaactgagcatgtctaattccatggcctgtccccacgttgc               | cassette for      |
| F        |                                                             | pUC-Y5            |
| Yht6-TEF | ggtaatttgagcgttccaatcatctgcggtagtagtactgcaaaaa              |                   |

---

|                |                                                        |              |
|----------------|--------------------------------------------------------|--------------|
| R              |                                                        |              |
| Yht6 F         | gcagtactaaccgcagatgattggaacgctcaaattaaccagg            | Yht6         |
| Yht6 R         | gtggggacaggccatggattacaattgagagggagggcgctc             | expression   |
| Yh6-XPR        | ccccctcctcaattgtaatccatggcctgtccccacgttgcc             | cassette for |
| F              |                                                        | pUC-Y6       |
| Hxk1-TEF       | tttcggggaccaagatgaaccatctgcggttagtactgcaaaaa           |              |
| R              |                                                        |              |
| Hxk1 F         | gcagtactaaccgcagatggttcatcttgggtccccgaaaacccc          | Hxk1         |
| Hxk1 R         | ggggacaggccatggactaaatcgtacttgacaccgggctt              | expression   |
| Hxk1-<br>XPR F | cggtgtcaagtacgatatttagtccatggcctgtccccacgttg           | cassette for |
| E3-FBA F       | caccactgcactaccactacacccatattggtacgtagcaacaacagtgtac   | pUC-Y6       |
| pfk-FBA        | gaacaggtgcctgaggtggagccattgtgtgatgttagttaga            |              |
| R              |                                                        |              |
| pfk F          | agattcgaatctaaactacacatcacacaatggctccacctcaggcacctgttc | PFK1         |
| pfk R          | aagcgtgacataactaattacatgagtcgtagtgcggcacagacctgga      | expression   |
| pfk-cyc F      | ctttccaggtctgtgccgacactacgactcatgtaattagttatgtca       | cassette for |
| cyc R          | gttcatgcaccactggaagatccgggaattcgaatgaaagccttcgagcgtccc | pUC-PFK      |

---

Table S2 Sugar and typical inhibitors contents in DLCA(sa) corn stover hydrolysates at different solid loading.

| Solid loading | Sugar concentrations (g/L) |           | Inhibitors concentrations (g/L) |                |                  |                  |             |           |
|---------------|----------------------------|-----------|---------------------------------|----------------|------------------|------------------|-------------|-----------|
|               | Glucose                    | Xylose    | Formic acid                     | Levulinic acid | Furfural         | HMF <sup>2</sup> | Acetic acid | Phenols   |
| 25%           | 88.1±1.2                   | 54.9±0.7  | 0.47±0.01                       | 1.54±0.02      | N.D <sup>1</sup> | 0.72±0.03        | 2.83±0.06   | 0.92±0.01 |
| 30%           | 100.4±0.4                  | 60.0±1.1  | 0.57±0.05                       | 1.83±0.02      | N.D <sup>1</sup> | 0.91±0.05        | 3.40±0.02   | 1.15±0.06 |
| 35%           | 121.1±1.3                  | 74.8±0.02 | 0.64±0.03                       | 1.91±0.06      | N.D <sup>1</sup> | 1.10±0.08        | 3.86±0.07   | 1.38±0.04 |

1. N. D data not detected

2. Hydroxymethylfurfural

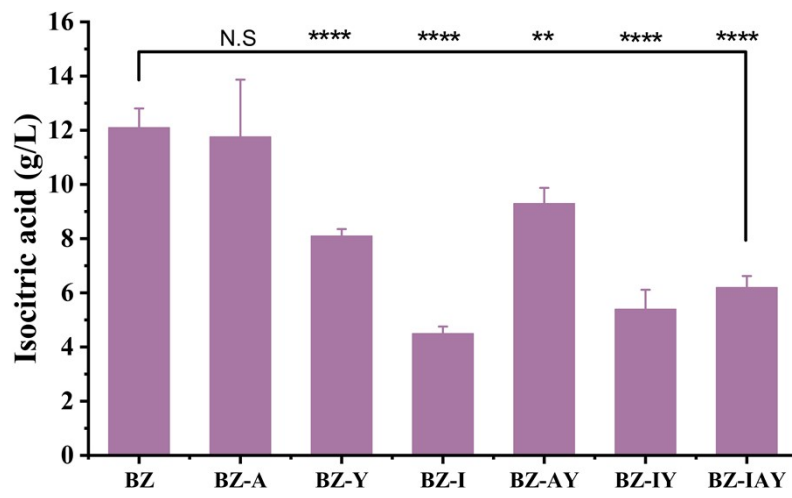

**Fig. S1** Isocitric acid production of the engineered strain.

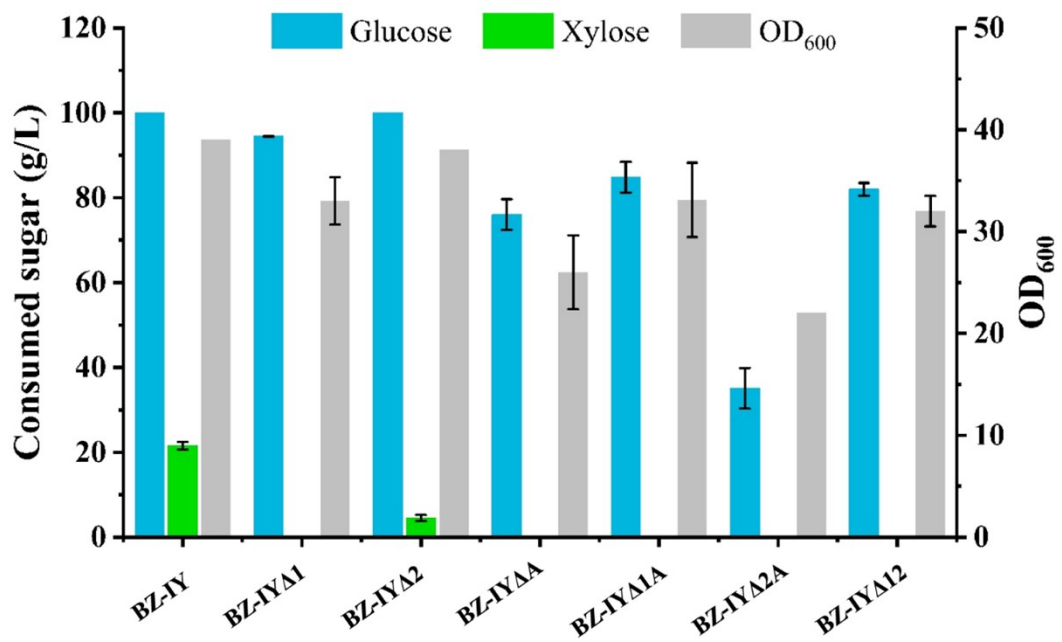

**Fig. S2** The effect of deleting *DGA1*, *DGA2*, *ACL* genes on the sugar consumption and OD<sub>600</sub> of the strain BZ-IY.

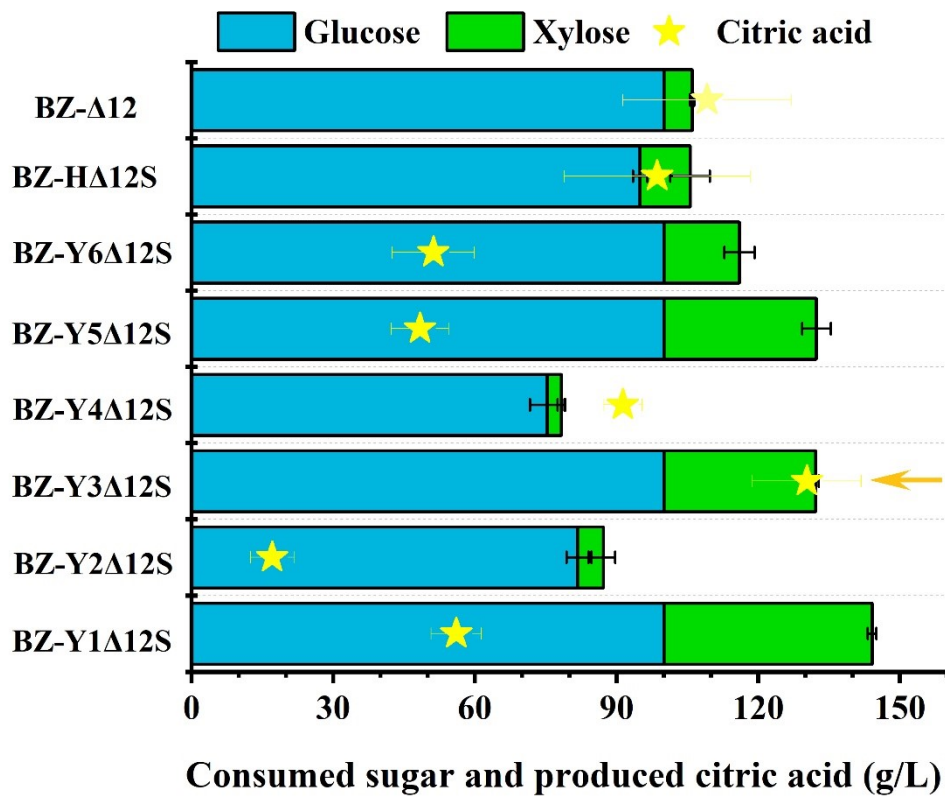

**Fig. S3** The effect of overexpression different glucose transporter genes to the sugar consumption rate and citric acid production and in strain BZ-Δ12S.
